# Supplementary material for: Identification of an intermediate in the deboronation of ortho-carborane: an adduct of ortho-carborane with two nucleophiles on one boron atom
Source: Royal Society of Chemistry journal article supplement (doi:10.1039/b716079h), 2008-01-01
Supplement: b716079h.pdf [file b716079h.pdf]

**Identification of An Intermediate in the Deboronation of *ortho*-Carborane.  
Adduct of *ortho*-Carborane with Two Nucleophiles on One Boron Atom**

Yoshiyuki Taoda, Takehiko Sawabe, Yasuyuki Endo,\*  
Kentaro Yamaguchi, Shinya Fujii and Hiroyuki Kagechika\*

**Supporting Information**

General

Reaction of 1-Bromo-*ortho*-carborane (**4**) with pyridine

Physicochemical data of compounds **6 – 8**

## Experimental

**General** Melting points were determined by using a Yanagimoto hot-stage melting point apparatus and are uncorrected. Elemental analyses were carried out in the Microanalytical Laboratory, Faculty of Pharmaceutical Sciences, The University of Tokyo, and were within  $\pm 0.3\%$  of the theoretical values.  $^1\text{H}$ -NMR spectra were recorded on a JEOL JNM-GX400, and chemical shifts are expressed in ppm relative to tetramethylsilane.  $^{11}\text{B}$ -NMR spectra were recorded on a JEOL JNM-A500 spectrometer, by using  $\text{BF}_3\text{-Et}_2\text{O}$  (15% v/v in  $\text{CDCl}_3$ ) as reference. X-ray data were collected on a Bruker Smart1000 CCD detector. The crystal structure was solved by direct methods SHELXS-97 (Sheldrick, 1997) and refined by full-matrix least-squares SHELXL-97 (Sheldrick, 1997). Mass spectra were measured on JEOL JMS-SZ 102A (EI). *Ortho*-Carborane (**1**) was purchased from Katchem s. r. o., Czech Republic. 1-Bromo-*ortho*-carborane (**4**) and 1,2-dibromo-*ortho*-carborane (**5**) were prepared by the method described in the reference 10.

### Reaction of 1-Bromo-*ortho*-carborane (**4**) with pyridine (Run 1 in Table 1)

A solution of 1-bromo-*ortho*-carborane (**4**, 250 mg, 1.12 mmol) in pyridine (1.5 ml) was stirred at room temperature for 20 h. The reaction mixture was poured into 2 M hydrochloric acid, extracted with  $\text{CH}_2\text{Cl}_2$ , and dried over  $\text{MgSO}_4$ . After evaporation, the residue was chromatographed on silica gel ( $\text{CH}_2\text{Cl}_2$  : *n*-hexane 4:1) to give **6a** (422 mg, 99%).

Compound **6a**: Colorless prisms ( $\text{CH}_2\text{Cl}_2$ ); mp  $148^\circ\text{C}$ ;  $^1\text{H}$ -NMR (acetone- $d_6$ )  $\delta$  8.96 (dd, 2 H,  $J = 1.5, 5.1$  Hz), 8.92 (dd, 2 H,  $J = 1.5, 5.1$  Hz), 8.35 (tt, 1 H,  $J = 1.5, 7.7$  Hz), 8.34 (tt, 1 H,  $J = 1.5, 7.7$  Hz), 7.92 (dd, 2 H,  $J = 5.1, 7.7$  Hz), 7.90 (dd, 2 H,  $J = 5.1, 7.7$  Hz), -3.0 (br s, 1 H), 0 - 4.0 (br m, 10 H);  $^{11}\text{B}$ -NMR (acetone- $d_6$ )  $\delta$  8.32 (s 1 B), -6.28 (d, 1 B), -10.19 (d, 1 B), -10.98 (d, 1 B), -13.08 (d, 1 B), -17.63 (d, 1 B), -19.26 (d, 1 B), -19.60 (d, 1 B), -26.12 (s 1 B), -34.49 (d, 1 B); Anal. Calcd for  $\text{C}_{12}\text{H}_{21}\text{B}_{10}\text{BrN}_2$ : C, 37.80; H, 5.55; N, 7.35. Found: C, 37.70; H, 5.45; N, 7.23.

Compounds **6c** and **6d** were similarly obtained from the reaction of 1-bromo-*ortho*-carborane (**4**) with 3-methylpyridine or 4-methylpyridine, respectively.

Compound **6c**: Colorless prisms (CH<sub>2</sub>Cl<sub>2</sub>-*n*-hexane); mp 146-147°C; <sup>1</sup>H-NMR (acetone-*d*<sub>6</sub>) δ 8.78 (m, 4 H), 8.13 (t, 2 H, *J* = 5.9 Hz), 7.79 (t, 1 H, *J* = 7.7 Hz), 7.75 (t, 1 H, *J* = 5.9 Hz), 2.48 (s, 3 H), 2.47 (s, 3 H), -2.93 (br s, 1 H), 0 - 4.50 (br m, 10 H); <sup>11</sup>B-NMR (acetone-*d*<sub>6</sub>) δ 7.11 (s 1 B), -7.31 (d, 1 B), -11.26 (d, 1 B), -12.23 (d, 1 B), -14.11 (d, 1 B), -18.85 (d, 1 B), -20.37 (d, 1 B), -20.79 (d, 1 B), -27.07 (s, 1 B), -35.54 (d, 1 B); Anal. Calcd for C<sub>14</sub>H<sub>25</sub>B<sub>10</sub>BrN<sub>2</sub>: C, 41.08; H, 6.15; N, 6.84. Found: C, 41.29; H, 6.24; N, 6.83.

Compound **6d**: Colorless prisms (CH<sub>2</sub>Cl<sub>2</sub>-*n*-hexane); mp 143-144°C; <sup>1</sup>H-NMR (acetone-*d*<sub>6</sub>) δ 8.75 (d, 2 H, *J* = 6.6 Hz), 8.70 (d, 2 H, *J* = 6.6 Hz), 7.69 (d, 2 H, *J* = 6.6 Hz), 7.68 (d, 2 H, *J* = 6.6 Hz), 2.57 (s, 3 H), 2.56 (s, 3 H), -2.97 (br s, 1 H), 0 - 4.50 (br m, 10 H); <sup>11</sup>B-NMR (acetone-*d*<sub>6</sub>) δ 7.36 (s 1 B), -6.99 (d, 1 B), -10.94 (d, 1 B), -11.68 (d, 1 B), -13.83 (d, 1 B), -18.47 (d, 1 B), -20.09 (d, 1 B), -20.46 (d, 1 B), -26.51 (s, 1 B), -35.23 (d, 1 B); Anal. Calcd for C<sub>14</sub>H<sub>25</sub>B<sub>10</sub>BrN<sub>2</sub>: C, 41.08; H, 6.15; N, 6.84. Found: C, 40.94; H, 5.91; N, 6.95.

Compounds **7a**, **7b** and **8d** were similarly obtained from the reaction of 1,2-dibromo-*ortho*-carborane (**5**) with pyridine, 3-chloropyridine, or 4-methylpyridine, respectively. In the case of **8d**, the crude mixture was purified by recrystallization without silica gel column chromatography.

Compound **7a**: Colorless prisms (CH<sub>2</sub>Cl<sub>2</sub>-*n*-hexane); mp 181-182°C; <sup>1</sup>H-NMR (acetone-*d*<sub>6</sub>) δ 8.96 (d, 4 H, *J* = 5.1 Hz), 8.40 (t, 2 H, *J* = 7.7 Hz), 7.97 (dd, 4 H, *J* = 7.3, 6.6 Hz), -2.76 (br s, 1 H), 0 - 4.50 (br m, 9 H); <sup>11</sup>B-NMR (acetone-*d*<sub>6</sub>) δ 7.07 (s 1 B), -7.43 (d, 3 B), -17.54 (d, 4 B), -27.94 (s, 1 B), -34.62 (d, 1 B); Anal. Calcd for C<sub>12</sub>H<sub>20</sub>B<sub>10</sub>Br<sub>2</sub>N<sub>2</sub>: C, 31.32; H, 4.38; N, 6.09. Found: C, 31.37; H, 4.43; N, 6.03.

Compound **7b**: Colorless prisms (CH<sub>2</sub>Cl<sub>2</sub>-*n*-hexane); mp 145-146°C; <sup>1</sup>H-NMR (acetone-*d*<sub>6</sub>) δ 9.10 (s, 2H), 8.95 (d, 2 H, *J* = 5.9 Hz), 8.44 (d, 2 H, *J* = 7.0 Hz), 7.99 (t, 2 H, *J* = 5.9 Hz), -2.81 (br s, 1 H), 0 - 4.40 (br m, 9 H); <sup>11</sup>B-NMR (acetone-*d*<sub>6</sub>) δ 6.70 (s 1 B), -8.52 (d, 3 B), -18.46 (d, 4

B), -29.21 (s, 1 B), -35.56 (d, 1 B); Anal. Calcd for  $C_{12}H_{18}B_{10}Br_2Cl_2N_2$ : C, 27.24; H, 3.43; N, 5.30. Found: C, 27.11; H, 3.37; N, 5.24.

Compound **8d**: Colorless prisms ( $CH_2Cl_2$ -*n*-hexane); mp 78-80°C;  $^1H$ -NMR (acetone- $d_6$ )  $\delta$  11.42 (br s, 1 H), 8.90 (d, 2 H,  $J = 6.2$  Hz), 8.06 (d, 2 H,  $J = 5.9$  Hz), 2.75 (s, 3 H), 2.25 (s, 1 H), -2.83 (br s, 1 H), -0.5 – 3.30 (br m, 9 H);  $^{11}B$ -NMR (acetone- $d_6$ )  $\delta$  -9.33 (d, 1 B), -13.32 (d, 1 B), -13.86 (d, 1 B), -16.22 (d, 1 B), -20.52 (d, 1 B), -22.52 (d, 1 B), -22.90 (d, 1 B), -34.20 (d, 1 B), -37.56 (d, 1 B); Anal. Calcd for  $C_8H_{19}B_9BrN$ : C, 31.36; H, 6.25; N, 4.57. Found: C, 31.36; H, 5.98; N, 4.85.
